# Supplementary material
Source: ML conference proceedings conference paper supplement (https://openreview.net/forum?id=zUiH8UUYDo)
Supplement: supplementary_material [file attachment]

# 1 Supplementary

In this supplementary material, we cover a generalized description of the Gaussian Process and the algorithm of the N4SID technique.

## 1.1 Gaussian Process

A Gaussian process generalizes multivariate normal distributions to distributions over functions that are specified by a prior mean function  $\mu(d)$  and covariance function  $\kappa(d_i, d_j; \theta)$  as

$$f(d) \sim \mathcal{GP}(\mu(d), \kappa(d_i, d_j; \theta)) \quad (1)$$

Where  $\theta$  indicates the kernel hyper-parameters that need to be optimized. The predictive distribution of the GP evaluated at the test points  $d_*$  of data  $\mathcal{D} = \{(d_i, y_i)\}_{i=1}^n$ , is given by

$$p(f(d_*)|\mathcal{D}) \sim \mathcal{GP}(\mu_{f|\mathcal{D}}(d_*), \kappa_{f|\mathcal{D}}(d_*, d_*')), \quad (2a)$$

$$\mu_{f|\mathcal{D}}(d) = \mu(d_*) + K_{d_*d} \hat{K}_\theta^{-1} y, \quad (2b)$$

$$\kappa_{f|\mathcal{D}}(d_*, d_*') = K_{d_*d_*'} - K_{d_*d} \hat{K}_\theta^{-1} K_{d_*d}^T \quad (2c)$$

where,  $\hat{K}_\theta = K_\theta + \sigma^2 \mathbf{I}$  is the covariance (kernel) matrix for the noisy targets  $y$ , and  $y = (y(x_1), \dots, y(x_n))^T$ . All kernel matrices implicitly depend on hyper-parameters,  $\theta$ , and the log marginal likelihood conditioned on the hyper-parameters is given by

$$\log p(y|\theta) = -\frac{1}{2} y^T \hat{K}_\theta^{-1} y - \frac{1}{2} \log |\hat{K}_\theta| - \frac{n}{2} \log 2\pi \quad (3)$$

where the three terms of the eq.3 have readily interpretable roles:  $-\frac{1}{2} y^T \hat{K}_\theta^{-1} y$  is the data-fit which involves the observed targets;  $\frac{1}{2} \log |\hat{K}_\theta|$  is the complexity penalty depending only on the kernel function and the inputs and  $\frac{n}{2} \log 2\pi$  is a normalization constant. Maximizing the log marginal likelihood provides a utility function for kernel learning.

## 1.2 N4SID System Identification Algorithm

In this work, we implement an alternative technique known as N4SID, a data-driven approach designed for system identification (proposed by Van Overschee & De Moor). This method utilizes a subspace-based strategy, which segregates the data into deterministic and stochastic elements by projecting them onto distinct orthogonal subspaces. The algorithm calculates the system's state sequence, state-transition matrix, input matrix, and output matrix from these subspaces, offering a concise and effective depiction of the inherent dynamical system. Essentially, N4SID is capable of directly approximating system behavior using input-output data in a state-space format. A description of the algorithm is shown below:

---

### Algorithm 1 N4SID Algorithm

---

- 1: **procedure** N4SID
  - 2:   Normalize input-output data.
  - 3:   Estimate a covariance matrix by applying QR decomposition.
  - 4:   Compute a singular value decomposition (SVD) of the covariance matrix.
  - 5:   Divide the SVD output into observable and unobservable subspaces.
  - 6:   From the observable subspace, compute the system matrices  $A$ ,  $B$ ,  $C$ , and  $D$ .
  - 7:   Perform the balancing transformation and reduction of the state-space model.
  - 8:   Return the state-space model.
  - 9: **end procedure**
- 

24

In this paper, considering the collected input-output data set  $u(k), y(k)_{k=1}^N$ , with  $u(k) \in \mathbb{R}^m$  representing the input data sample,  $\{v_{xk}, v_{yk}, \psi_k, \delta_k, \omega_k, a_{xk}, \Delta \delta_k, u_{Tk}, u_{Bk}\}$ , and  $y(k) \in \mathbb{R}^p$  denoting

27 the output vector,  $\epsilon_{v_x k}, \epsilon_{v_y k}, \epsilon_{\omega k}$ , at time  $k$ , N4SID can effectively approximate the system's dynam-  
28 ics using a state-space representation, as demonstrated in 4.

$$\begin{cases} x(t+1) = Ax(k) + Bu(k) \\ y(t) = Cx(k) + Du(k) \end{cases} \quad (4)$$
